# Supplementary material
Source: MDPI journal article supplement (https://www.mdpi.com/2227-9040/9/7/177)
Supplement: s1 [file s1]

Supplementary

# Optical pH Sensing in Milk: A Small Puzzle of Indicator Concentrations and the Best Detection Method

Olga Voskoboinikova <sup>1</sup>, Aleksey Sukhanov <sup>1,\*</sup> and Axel Duerkop <sup>2</sup>

<sup>1</sup> School of Computer Science & Robotics of Tomsk Polytechnic University, Lenin Avenue 30, 634050 Tomsk, Russia; vostok@tpu.ru

<sup>2</sup> Institute of Analytical Chemistry, Chemo and Biosensors, University of Regensburg, Universitätsstraße 31, 93053 Regensburg, Germany; axel.duerkop@chemie.uni-regensburg.de

\* Correspondence: suhanov@tpu.ru

**Citation:** Voskoboinikova, O.; Sukhanov, A.; Duerkop, A. Optical pH Sensing in Milk: A Small Puzzle of Indicator Concentrations and the Best Detection Method. *Chemosensors* **2021**, *9*, 177. <https://doi.org/10.3390/chemosensors9070177>

Academic Editor: Pietro Salvo

Received: 8 June 2021

Accepted: 8 July 2021

Published: 12 July 2021

**Publisher's Note:** MDPI stays neutral with regard to jurisdictional claims in published maps and institutional affiliations.

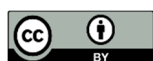

**Copyright:** © 2021 by the authors. Submitted for possible open access publication under the terms and conditions of the Creative Commons Attribution (CC BY) license (<http://creativecommons.org/licenses/by/4.0/>).

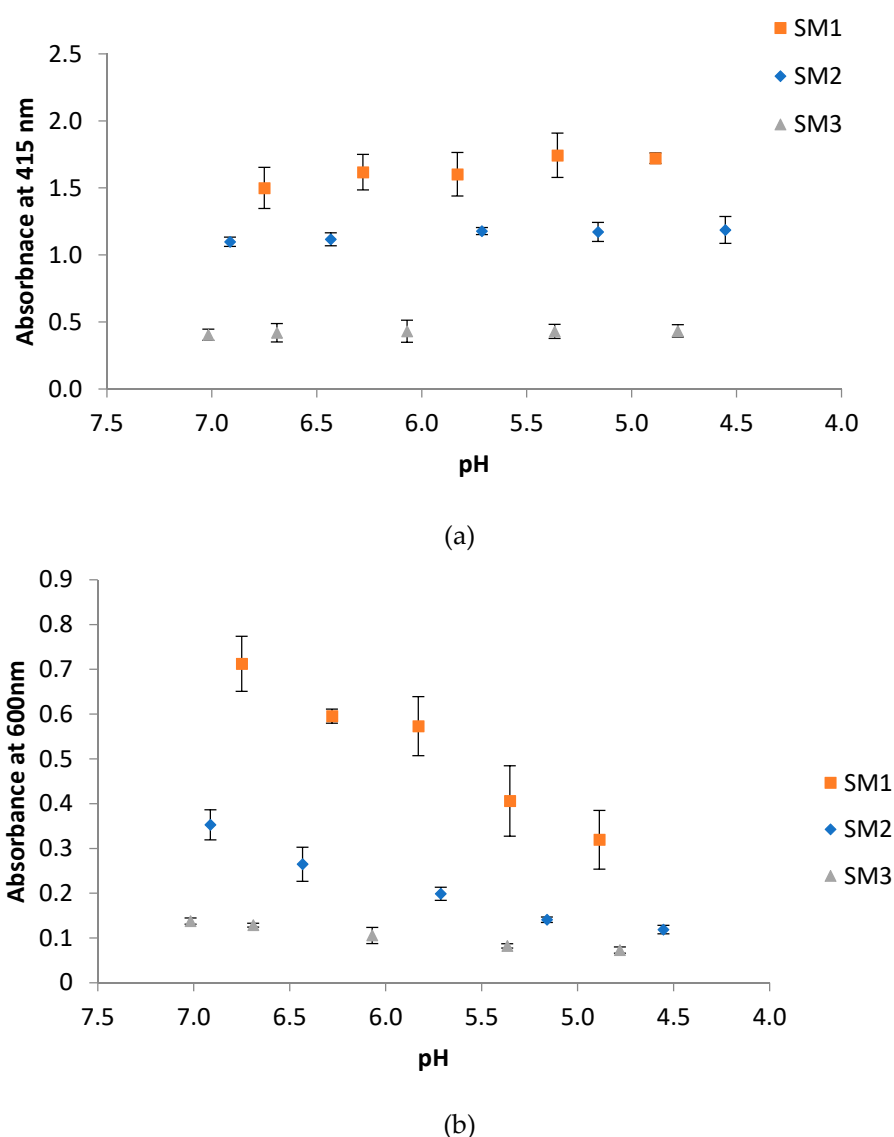

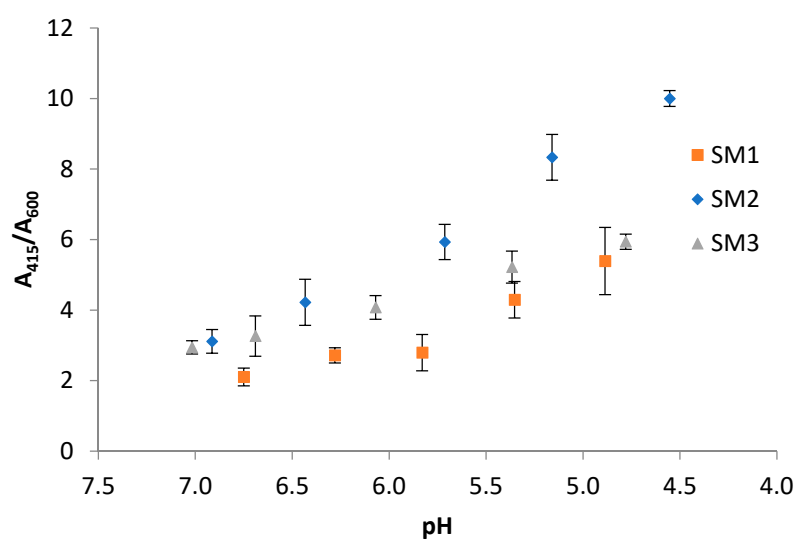

(c)

**Figure S1.** Dependence of an analytical signal on the pH of the milk samples: (a) absorbance at 415 nm; (b) absorbance at 600 nm; (c) ratio  $A_{415}/A_{600}$ ,  $n = 3$ , error bars represent standard deviation.
